# Supplementary material for: Waste Not, Want Not: Why Rarefying Microbiome Data Is Inadmissible
Source: PLoS Comput Biol. 2014 Apr 3;10(4):e1003531. doi: 10.1371/journal.pcbi.1003531 (PMC3974642; doi:10.1371/journal.pcbi.1003531)
Supplement: Protocol S1 — A zip file containing all supplementary source files. This includes the Rmd source code, HTML output, and all related documentation and code to completely and exactly recreate every results figure in this article. (ZIP) [file pcbi.1003531.s001.zip › norarefy-source/simulation-design/cluster_ocean_feces-ex-sim.csv]

M31Fcsw	NP3	M11Fcsw	NP2	TS28	NP3	M31Fcsw	TS29	TS28	NP3
158	56	214	39	47	4	11	11	5	3
124	54	212	29	40	3	10	7	8	6
129	46	216	33	42	4	13	7	3	6
11	3	14	3	1	39	95	63	29	37
19	7	34	7	0	88	237	137	73	86
9	1	15	1	2	29	84	51	14	29
