# Supplementary material for: Waste Not, Want Not: Why Rarefying Microbiome Data Is Inadmissible
Source: PLoS Comput Biol. 2014 Apr 3;10(4):e1003531. doi: 10.1371/journal.pcbi.1003531 (PMC3974642; doi:10.1371/journal.pcbi.1003531)
Supplement: Protocol S1 — A zip file containing all supplementary source files. This includes the Rmd source code, HTML output, and all related documentation and code to completely and exactly recreate every results figure in this article. (ZIP) [file pcbi.1003531.s001.zip › norarefy-source/simulation-design/sim_cluster_ocean_feces_otu_matrix.csv]

NP2	NP3	NP5	M31Fcsw	M11Fcsw	TS28	TS29
15	15	161	0	0	0	0
87	4	72	0	0	0	0
10	148	15	0	0	0	0
0	0	0	82	244	7	24
0	0	0	354	452	92	1
0	0	0	14	9	33	251
