# Supplementary material for: Waste Not, Want Not: Why Rarefying Microbiome Data Is Inadmissible
Source: PLoS Comput Biol. 2014 Apr 3;10(4):e1003531. doi: 10.1371/journal.pcbi.1003531 (PMC3974642; doi:10.1371/journal.pcbi.1003531)
Supplement: Protocol S1 — A zip file containing all supplementary source files. This includes the Rmd source code, HTML output, and all related documentation and code to completely and exactly recreate every results figure in this article. (ZIP) [file pcbi.1003531.s001.zip › norarefy-source/simulation-design/sim_diff_abund_matrix_after_effect.csv]

AQC4cm	CC1	TRRsed3	NP5	CC1	CL3	AQC4cm	TS28
380	100	60	120	15	14	26	9
13	13	0	11	4	3	13	7
15	10	1	13	9	8	24	6
470	210	70	390	23	17	42	23
98	48	11	70	49	36	108	36
25	12	3	20	14	8	23	13
