# Supplementary material for: Waste Not, Want Not: Why Rarefying Microbiome Data Is Inadmissible
Source: PLoS Comput Biol. 2014 Apr 3;10(4):e1003531. doi: 10.1371/journal.pcbi.1003531 (PMC3974642; doi:10.1371/journal.pcbi.1003531)
Supplement: Protocol S1 — A zip file containing all supplementary source files. This includes the Rmd source code, HTML output, and all related documentation and code to completely and exactly recreate every results figure in this article. (ZIP) [file pcbi.1003531.s001.zip › norarefy-source/simulation-design/simulation-design-figure-ex-matrix.R]

################################################################################
#
# Sample Clustering, Mixing
#
################################################################################
set.seed(20140206)
library("phyloseq")
data("GlobalPatterns")
OceanReal = subset_samples(GlobalPatterns, SampleType=="Ocean")
OceanTop = names(sort(taxa_sums(OceanReal), decreasing=TRUE)[1:3])
FecesReal = subset_samples(GlobalPatterns, SampleType=="Feces")
FecesTop = names(sort(taxa_sums(FecesReal), decreasing=TRUE)[1:3])
# Get matrix with both
BothOF = subset_samples(GlobalPatterns, SampleType %in% c("Ocean", "Feces"))
BothOF = prune_taxa(c(FecesTop, OceanTop), BothOF)
BothOF = as(otu_table(BothOF), "matrix")[, c(sample_names(OceanReal), sample_names(FecesReal))]
# Divide by 1000, for example simplicity
BothOF = floor(BothOF/1000)
OceanVec = rowSums(BothOF[, sample_names(OceanReal)])
OceanVec = matrix(OceanVec, nrow=length(OceanVec), dimnames=list(names(OceanVec)))
FecesVec = rowSums(BothOF[, sample_names(FecesReal)])
FecesVec = matrix(FecesVec, nrow=length(FecesVec), dimnames=list(names(FecesVec)))
# Write the example table and the example multinomial
write.csv(BothOF,   file="sim_cluster_ocean_feces_otu_matrix.csv", col.names=FALSE, row.names=FALSE)
write.csv(OceanVec, file="ocean-multinomial.csv", col.names=FALSE, row.names=FALSE)
write.csv(FecesVec, file="feces-multinomial.csv", col.names=FALSE, row.names=FALSE)
# Defined artificial mixing.
# Mix each multinomial by adding total/EffectSize counts from the other.
# Create mixed multinomial by adding counts from the other in precise proportion,
# a total of Library Size / Effect Size
EffectSize = 10
addToOcean = round(sum(OceanVec) * FecesVec / (sum(FecesVec) * EffectSize), 0)
addToFeces = round(sum(FecesVec) * OceanVec / (sum(OceanVec) * EffectSize), 0)
# Add them together to create "dirty" multinomial
dirtyOcean = addToOcean + OceanVec
dirtyFeces = addToFeces + FecesVec
# Write the dirty multinomials
write.csv(dirtyOcean, file="dirty-ocean-multinomial.csv", col.names=FALSE, row.names=FALSE)
write.csv(dirtyFeces, file="dirty-feces-multinomial.csv", col.names=FALSE, row.names=FALSE)
# Example of "simulated" count matrix with 5 columns/samples each class
J = 5
NLOcean = sample(colSums(BothOF), size=J, replace=TRUE)
NLFeces = sample(colSums(BothOF), size=J, replace=TRUE)
# Simulate Ocean
OceanSim = sapply(NLOcean, function(NL, dirtyOcean){
  table(sample(rownames(dirtyOcean), NL, replace=TRUE, prob=dirtyOcean))[rownames(dirtyOcean)]
}, dirtyOcean)
# Simulate Feces
FecesSim = sapply(NLFeces, function(NL, dirtyFeces){
  table(sample(rownames(dirtyFeces), NL, replace=TRUE, prob=dirtyFeces))[rownames(dirtyFeces)]
}, dirtyFeces)
# Convert NA to zero
OceanSim[is.na(OceanSim)] <- 0L
FecesSim[is.na(FecesSim)] <- 0L
# Write simulated table
write.csv(cbind(OceanSim, FecesSim), file="cluster_ocean_feces-ex-sim.csv", col.names=FALSE, row.names=FALSE)
################################################################################
#
# Differential Abundance
#
################################################################################
library("phyloseq")
data("GlobalPatterns")
SkinReal = subset_samples(GlobalPatterns, SampleType=="Skin")
SkinTop = names(sort(taxa_sums(SkinReal), decreasing=TRUE)[1:6])
SkinMat = round(as(otu_table(prune_taxa(SkinTop, SkinReal)), "matrix")/1000, 0)
# Write to csv
write.csv(SkinMat, file="sim_diff_abund_matrix_ex_real_matrix.csv", col.names=FALSE, row.names=FALSE)
# Create the rowsum version (multinomial)
SkinMatRS = matrix(rowSums(SkinMat), nrow=nrow(SkinMat), dimnames=list(rownames(SkinMat)))
write.csv(SkinMatRS, file="sim_diff_abund_matrix_ex_real_matrix_RS.csv", col.names=FALSE, row.names=FALSE)
# Simulate by sampling from multinomial
# Example of "simulated" count matrix with 4 columns/samples each class
J = 4
NL = sample(round(sample_sums(GlobalPatterns)/10000, 0), size=J*2, replace=TRUE)
# Simulate Test and NULL
nullmat = sapply(NL, function(NL, SkinMatRS){
  table(sample(rownames(SkinMatRS), NL, replace=TRUE, prob=SkinMatRS))[rownames(SkinMatRS)]
}, SkinMatRS)
nullmat[is.na(nullmat)] <- 0L
write.csv(nullmat, file="sim_diff_abund_matrix_before_effect.csv", col.names=FALSE, row.names=FALSE)
# Apply "effect" to random (arbitrary in this case) rows
testmat = nullmat
EffectSize = 10
effectrows = c(1, 4)
effectcols = 1:J
testmat[effectrows, effectcols] <- EffectSize * testmat[effectrows, effectcols]
# write to csv
write.csv(testmat,  file="sim_diff_abund_matrix_after_effect.csv", col.names=FALSE, row.names=FALSE)
