# Supplementary material for: Waste Not, Want Not: Why Rarefying Microbiome Data Is Inadmissible
Source: PLOS journal article supplement (doi:10.1371/journal.pcbi.1003531), 2014-04-03
Supplement: S2 (10.1371/journal.pcbi.1003531.s002) [file journal.pcbi.1003531.s002]

301 Moved Permanently

# Moved Permanently

The document has moved here.

---

Apache Server at www.ploscompbiol.org Port 80
