# Supplementary figures and images for: Waste Not, Want Not: Why Rarefying Microbiome Data Is Inadmissible
Source: PLOS journal article supplement (doi:10.1371/journal.pcbi.1003531), 2014-04-03

Distance Method: —●— Bray-Curtis —▲— PoissonDist —■— top-MSD —✱— UniFrac-u —■— UniFrac-w

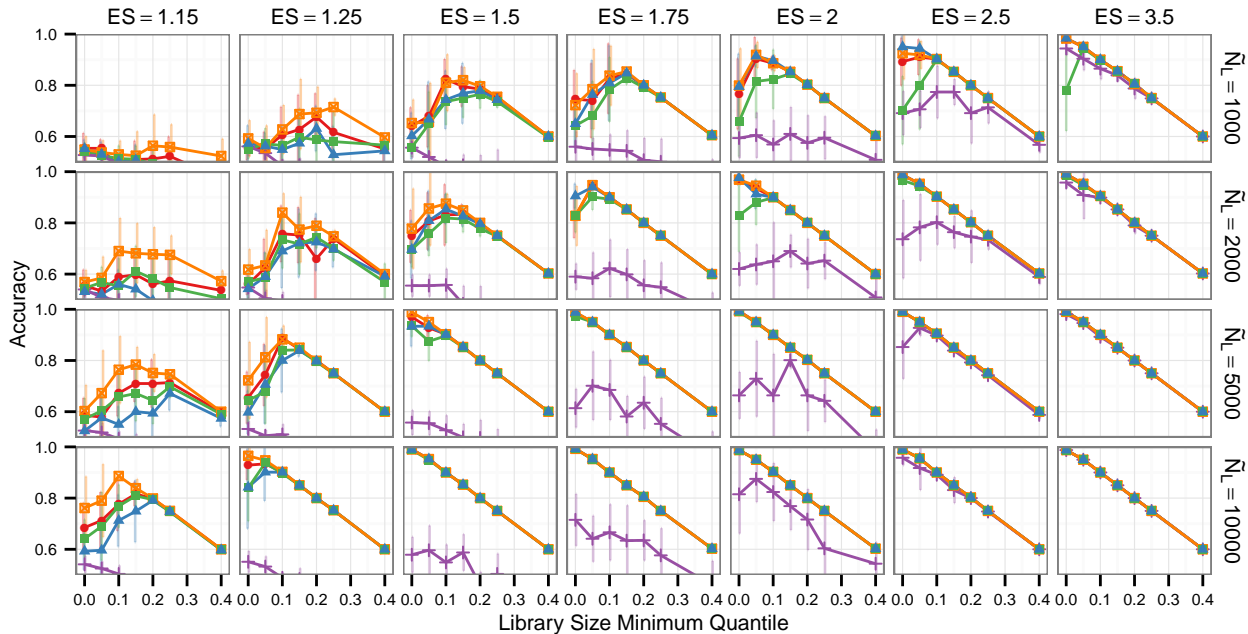

Supplement: S1 (10.1371/journal.pcbi.1003531.s001) [file journal.pcbi.1003531.s001]

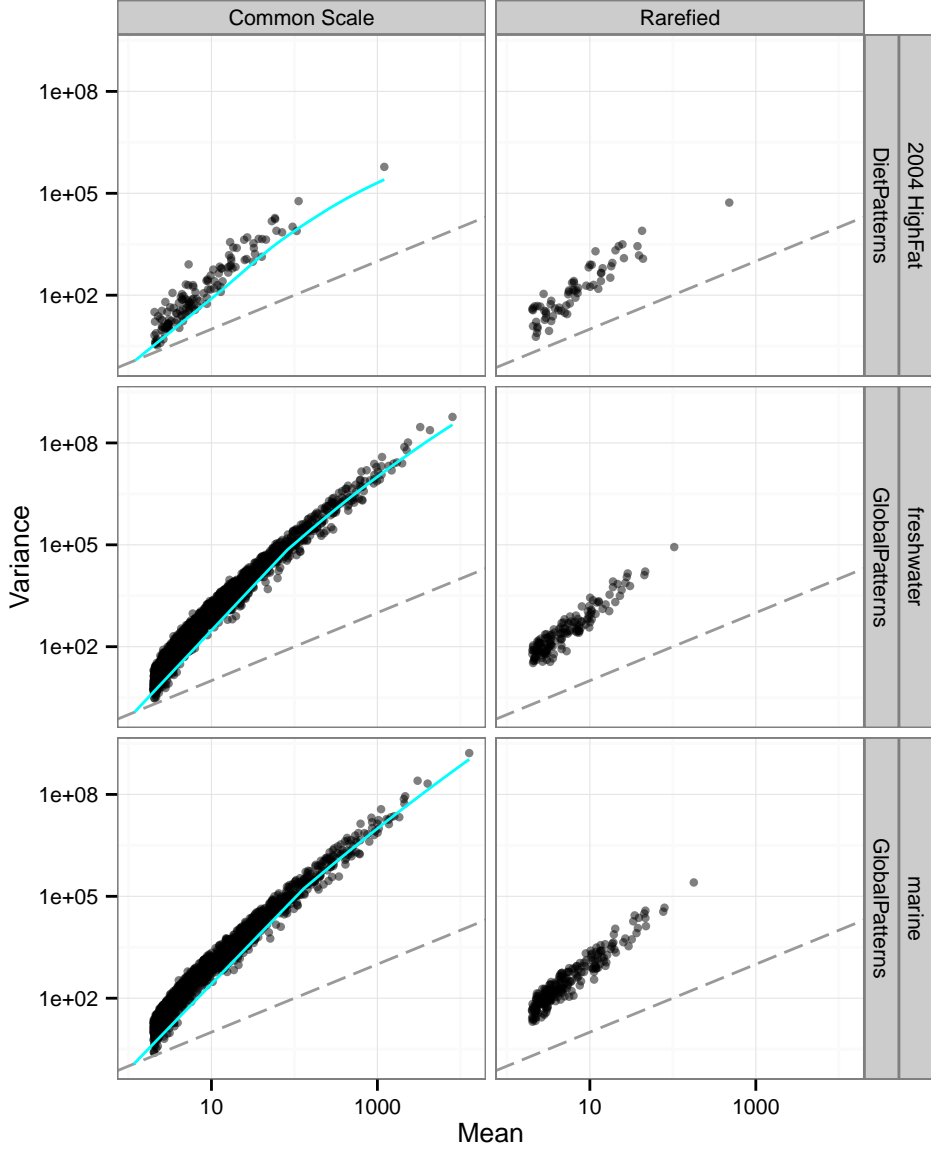

Supplement: S1 (10.1371/journal.pcbi.1003531.s001) [file journal.pcbi.1003531.s001]

Distance Method:  Bray-Curtis  PoissonDist  top-MSD  UniFrac-u  UniFrac-w

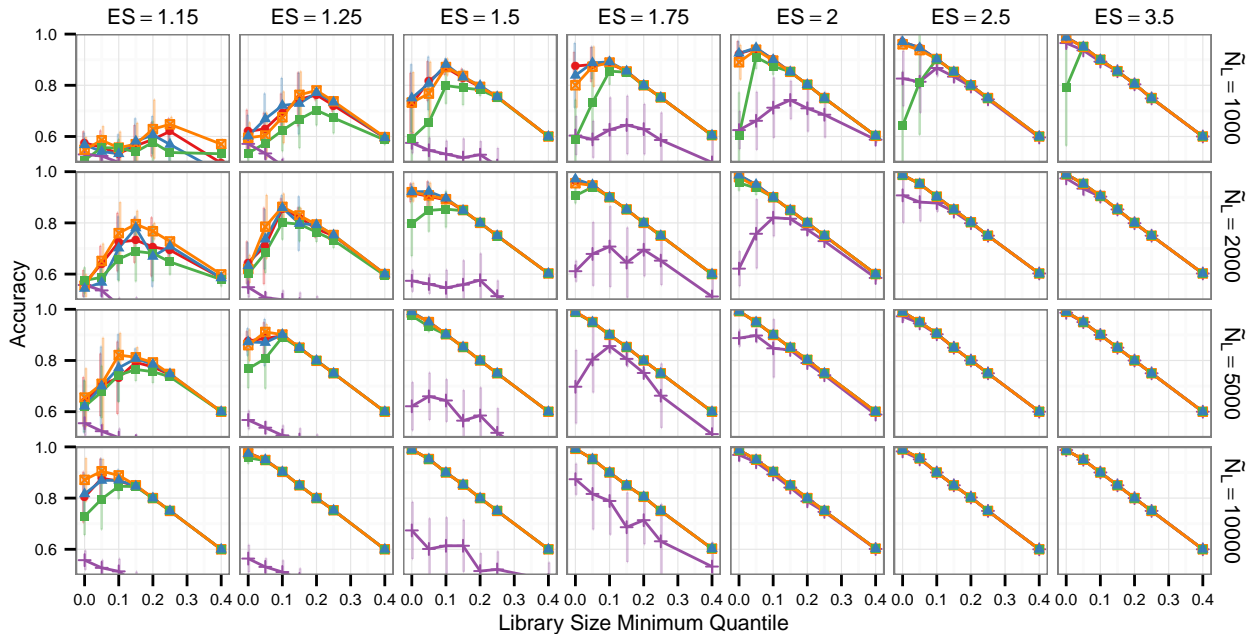

Supplement: S1 (10.1371/journal.pcbi.1003531.s001) [file journal.pcbi.1003531.s001]
